RESEARCH ARTICLE

# Selection of Genes Associated with Variations in the Circle of Willis in Gerbils Using Suppression Subtractive Hybridization

Zhenkun Li<sup>1</sup>, Xueyun Huo<sup>1</sup>, Shuangyue Zhang<sup>1</sup>, Jing Lu<sup>1</sup>, Changlong Li<sup>1</sup>, Meng Guo<sup>1</sup>, Rui Fu<sup>2</sup>, Zhengming He<sup>2</sup>, Xiaoyan Du<sup>1\*</sup>, Zhenwen Chen<sup>1\*</sup>

**1** Department of Laboratory Animal Science, School of Basic Medical Science, Capital Medical University, Beijing 100069, China, **2** Institute for Laboratory Animal Resources, National Institutes for Food and Drug Control, Beijing 100050, China

\* [czwen@ccmu.edu.cn](mailto:czwen@ccmu.edu.cn) (ZC); [duduyan@ccmu.edu.cn](mailto:duduyan@ccmu.edu.cn) (XD)

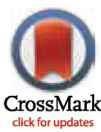

**OPEN ACCESS**

**Citation:** Li Z, Huo X, Zhang S, Lu J, Li C, Guo M, et al. (2015) Selection of Genes Associated with Variations in the Circle of Willis in Gerbils Using Suppression Subtractive Hybridization. PLoS ONE 10(5): e0127355. doi:10.1371/journal.pone.0127355

**Academic Editor:** Carlo Gaetano, Goethe University, GERMANY

**Received:** November 29, 2014

**Accepted:** April 14, 2015

**Published:** May 14, 2015

**Copyright:** © 2015 Li et al. This is an open access article distributed under the terms of the [Creative Commons Attribution License](http://creativecommons.org/licenses/by/4.0/), which permits unrestricted use, distribution, and reproduction in any medium, provided the original author and source are credited.

**Data Availability Statement:** All EST files are available from the GenBank database (accession number(s) JZ732990- JZ733059).

**Funding:** This study was funded by the National Science Foundation of China (Nos. 31372272, ZC; 31172168, ZC; 31272393, XD), the website is <http://www.nsf.gov.cn/Portal0/default152.htm>; Key Projects in the National Science & Technology Pillar Program (No. 2015BAI09B01, ZC); Beijing Natural Science Foundation (No. 5122005, XD; 7141002, ZC), the website is <http://www.bjnsf.org>. All of the funders are aimed at finding out genes associated

## Abstract

Deformities in the Circle of Willis (CoW) can significantly increase the risk of cerebrovascular disease in humans. However, the molecular mechanisms underlying these deformities have not been understood. Based on our previous studies, variations in the CoW of gerbils are hereditary. A normal CoW is observed in approximately 60% of gerbils, a percentage that also applies to humans. Thus, gerbil is an ideal experimental model for studying variations in the CoW. To study the mechanisms underlying these variations, we selected genes associated with different types of the CoW using suppression subtractive hybridization (SSH). After evaluating the efficiency of SSH using quantitative real-time polymerase chain reaction (qPCR) on subtracted and unsubtracted cDNA and Southern blotting on SSH PCR products, 12 SSH libraries were established. We identified 4 genes (*CST3*, *GNAS*, *GPx4* and *PFN2*) associated with variations in the CoW. These genes were identified with qPCR and Western blotting using 70 expressed sequence tags from the SSH libraries. Cloning and sequencing allowed us to demonstrate that the 4 genes were closely related to mouse genes. We may assume that these 4 genes play an important role in the development of variations in the CoW. This study provides a foundation for further research of genes related to development of variations in the CoW and the mechanisms of dysmorphism of cerebral vessels.

## Introduction

Cerebrovascular disease is a leading cause of disability, and one of the three major causes of death along with heart diseases and malignant tumors [1]. Data published in the China Health Statistical Yearbook (2010) showed that cerebrovascular disease was the third cause of death among urban residents and the first among rural residents. It has been suggested that cerebrovascular disease is a secondary factor affecting life expectancy in China [2]. Additionally, cerebrovascular disease was ranked among the top 4 causes of death in the United States [3]. The

with Variations in the Circle of Willis in Gerbils in this study.

**Competing Interests:** The authors have declared that no competing interests exist.

Circle of Willis (CoW), or Willis' Circle, is a primary arterial collateral structure interconnecting hemispheric circulation within the brain, and it is composed of the anterior cerebral artery (ACA), anterior communicating artery (ACoA), internal carotid artery (ICA), posterior cerebral artery (PCA), and posterior communicating artery (PCoA) [4]. The CoW is related to various cerebrovascular diseases. Studies have shown that a variety of CoW deformities occur in humans; only 45.2% of the population has a normal CoW structure, while the remaining 54.8% has variations in the ACoA and PCoA, and subsequently are at increased risk of cerebrovascular disease [5]. Eighty-five percent of saccular aneurysms occur at the polygon of the CoW [6], and the incidence of ruptured aneurysms in patients with anatomical variation of the CoW can be as high as 75.7% [7]. In addition, variation in the CoW is a risk factor for ischemia and stroke in humans [8] and is significantly linked to intracerebral hemorrhage in ischemic stroke patients after intravenous thrombolysis [9]. Furthermore, variations in the CoW can affect the symptoms and prognosis of cerebral ischemia caused by internal carotid artery occlusion [10].

Elucidating the molecular mechanisms causing variations in the CoW is important for predicting and evaluating cerebrovascular disease risk. In studies of the cerebrovascular diseases, the Mongolian gerbil has been used as a model animal for cerebral ischemia, because of malformations in the CoW observed in this species [11]. Both the PCoA and ACoA of the CoW in gerbils express different types of variations. We identified these variations based on the completeness of the PCoA and ACoA and classified them into 8 categories: Type A-I, both the PCoA and ACoA are complete; Type A-II, the PCoA is complete, but the ACoA is missing; Type A-III, the PCoA is complete, but the left branch of the ACA is small or missing; Type A-IV, the PCoA is complete, but the right branch of the ACA is small or missing; Type B-I, the PCoA is missing and the ACoA is complete; Type B-II, both the PCoA and ACoA are missing; Type B-III, the PCoA is missing and the left branch of the ACA is small or missing; and Type B-IV, the PCoA is missing and the right branch of the ACA is small or missing [12]. The percentage of animals with a normal CoW is about 60%, which also applies to humans (approximately 42–52% in the Western populations and 27% in the Chinese population) [13]. Mongolian gerbils exhibit congenital malformations of the CoW, making them an ideal experimental model for cerebral ischemia research. Moreover, our previous research showed that variations in the CoW of gerbils are hereditary [12], and an inbred strain was developed to provide a genetically consistent animal model for exploring the molecular mechanisms contributing to variations in the CoW. We explored genes that might determine different phenotypes of the CoW at the expression level using suppression subtractive hybridization (SSH) in the inbred strain of gerbils. SSH is used to study the expression levels of genes in different physiological states or different growth stages. This method greatly reduces the false-positive rate, has high sensitivity, high speed, and high efficiency, and its applications has helped to gradually expand knowledge on the genome of various species [14,15] and the genes related to development and reproduction [16]. In this study, we performed SSH to screen the genes associated with variations in the CoW in  $F_{10}$  inbred gerbils.

## Results

### Construction of SSH libraries by various types of the CoW

We developed SSH libraries using 9 brain samples from  $F_{10}$  inbred gerbils classified into 4 groups (Group 1–4) and 12 sub-groups based on the CoW type (Table 1). In Group 1, subgroup 1.1 was constructed using the Type B-I sample as the tester and the Type B-II sample as the driver, while subgroup 1.2 was constructed using the Type B-II sample as the tester and the Type B-I sample as the driver. In Group 2, subgroup 2.1 was constructed using the Type B-III sample as the tester and the Type B-I sample as the driver, while subgroup 2.2 was constructed

**Table 1. Types of the Circle of Willis (CoW) in gerbils that used for the development of 12 suppression subtractive hybridization (SSH) libraries (Groups 1–4).**

| SSH library group | SSH library group and verified sample | Type of the CoW |            | Number of samples |        |
|-------------------|---------------------------------------|-----------------|------------|-------------------|--------|
|                   |                                       | Tester          | Driver     | Tester            | Driver |
| SSH library group | Group 1.1                             | Tester          | Type B-I   | Tester            | 1      |
|                   |                                       | Driver          | Type B-II  | Driver            | 2      |
|                   | Group 1.2                             | Tester          | Type B-II  | Tester            | 2      |
|                   |                                       | Driver          | Type B-I   | Driver            | 1      |
|                   | Group 2.1                             | Tester          | Type B-III | Tester            | 3      |
|                   |                                       | Driver          | Type B-I   | Driver            | 4      |
|                   | Group 2.2                             | Tester          | Type B-I   | Tester            | 4      |
|                   |                                       | Driver          | Type B-III | Driver            | 3      |
|                   | Group 3.1                             | Tester          | Type B-IV  | Tester            | 5      |
|                   |                                       | Driver          | Type B-I   | Driver            | 6      |
|                   | Group 3.2                             | Tester          | Type B-I   | Tester            | 6      |
|                   |                                       | Driver          | Type B-IV  | Driver            | 5      |
|                   | Group 4.1                             | Tester          | Type A-I   | Tester            | 7      |
|                   |                                       | Driver          | Type A-IV  | Driver            | 8      |
|                   | Group 4.2                             | Tester          | Type A-IV  | Tester            | 8      |
|                   |                                       | Driver          | Type A-I   | Driver            | 7      |
|                   | Group 4.3                             | Tester          | Type A-I   | Tester            | 7      |
|                   |                                       | Driver          | Type B-I   | Driver            | 9      |
|                   | Group 4.4                             | Tester          | Type B-I   | Tester            | 9      |
|                   |                                       | Driver          | Type A-I   | Driver            | 7      |
|                   | Group 4.5                             | Tester          | Type A-IV  | Tester            | 8      |
|                   |                                       | Driver          | Type B-I   | Driver            | 9      |
|                   | Group 4.6                             | Tester          | Type B-I   | Tester            | 9      |
|                   |                                       | Driver          | Type A-IV  | Driver            | 8      |
| Verified samples  | Group A                               | Type A-I        |            | 10/11/12          |        |
|                   | Group B                               | Type A-IV       |            | 13/14/15          |        |
|                   | Group C                               | Type B-I        |            | 16/17/18          |        |
|                   | Group D                               | Type B-III      |            | 19/20/21          |        |
|                   | Group E                               | Type B-IV       |            | 22/23/24          |        |

doi:10.1371/journal.pone.0127355.t001

using the Type B-I sample as the tester and the Type B-III sample as the driver. In Group 3, subgroup 3.1 was constructed using the Type B-I sample as the tester and the Type B-IV sample as the driver, while subgroup 3.2 was constructed using the Type B-IV sample as the tester and the Type B-I sample as the driver. In Group 4, subgroup 4.1 was constructed using the Type A-I sample as the tester and the Type A-IV sample as the driver, while subgroup 4.2 was constructed using the Type A-IV sample as the tester and the Type A-I sample as the driver. Subgroup 4.3 was constructed using the Type A-I sample as the tester and the Type B-I sample as the driver, while subgroup 4.4 was constructed using the Type B-I sample as the tester and the Type A-I sample as the driver. Subgroup 4.5 was constructed using the Type A-IV sample as the tester and the Type B-I sample as the driver, while subgroup 4.6 was constructed using the Type B-I sample as the tester and the Type A-IV sample as the driver. Because SSH can make the differential expression genes being enriched while other genes being hybridized,  $\beta$ -actin, as a housekeeping gene, should exist low expression level in the PCR product after subtracted [17]. Besides, the genes after subtracted should have less cDNA fragments in tester and it can be tested by Southern blotting. Therefore, the efficiency of SSH method was

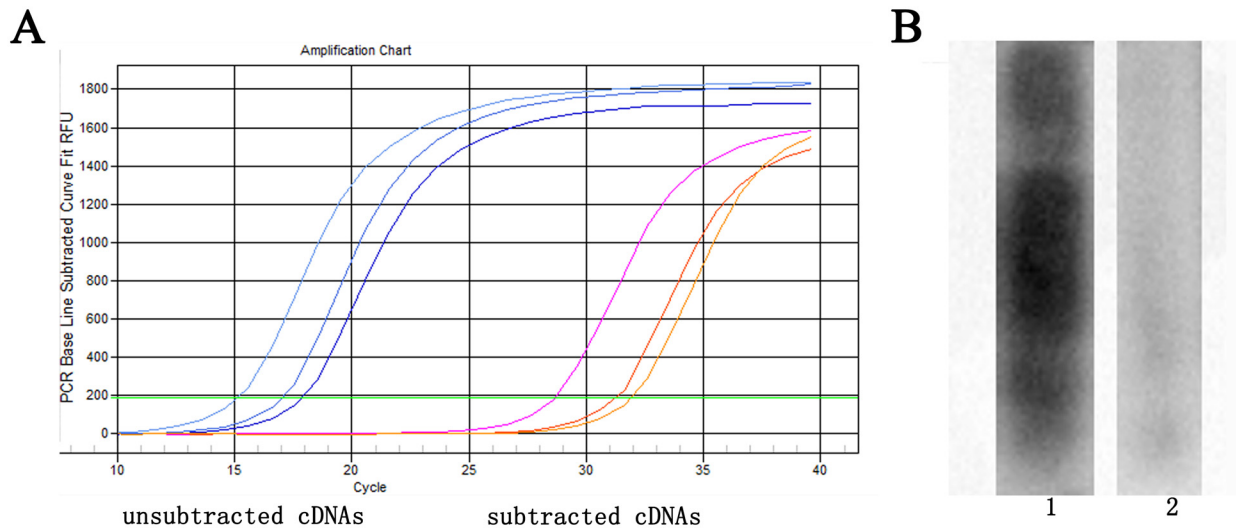

**Fig 1. The efficiency of suppression subtractive hybridization (SSH) evaluated by qPCR and Southern blotting.** (A) The efficiency was evaluated by qPCR with  $\beta$ -actin primers. (B) The efficiency was evaluated by Southern blotting with dig-labeled PCR product hybridized on the PCR products in the same group. The value of grey scanning of the dig-labeled SSH PCR product hybridized with itself (1) (191) is 2-fold higher than that hybridized with the SSH PCR product of another animal in the same SSH group (2) (85).

doi:10.1371/journal.pone.0127355.g001

evaluated by quantitative real-time polymerase chain reaction (qPCR) with  $\beta$ -actin primers on subtracted and unsorted cDNA and Southern blotting on SSH PCR products. Typical results of qPCR and Southern blotting are shown in Fig 1. Fig 1A shows the qPCR results of subgroups 2.1, 2.2, and 4.1. The  $C_t$  values of the tester and sorted cDNA, respectively, of subgroup 2.1 were 16.55 and 31.34; subgroup 2.2, 14.59 and 27.46; and subgroup 4.1, 17.25 and 27.86. The  $C_t$  values of the testers were lower than those of the sorted cDNA and the expression level of  $\beta$ -actin of the unsorted cDNA was about 4000 fold higher than that of the sorted cDNA. Fig 1B shows the Southern blotting results of subgroup 1.1. The value of grey scanning of the dig-labeled SSH PCR product hybridized with itself was different from that hybridized with the SSH PCR product of another animal in the same SSH group and demonstrated we had a fine effect on SSH. The value of grey scanning of the PCR product of animal number 1 (used as probe) was 191, 2-fold higher than that of animal number 2 (85). In summary, these results showed that our SSH method was highly efficient.

### Selection of genes associated with variations of the CoW in gerbil SSH libraries

We sequenced approximately 900 positive clones and identified 304 cDNA sequences from 12 SSH libraries. The size of cDNA sequences within the libraries ranged from 50 to 600 bp. Sequence analysis using Basic Local Alignment Search Tool (BLAST) revealed that 84 out of 304 genes (27.63%) had previously been identified and information on their function was available on the Mouse Genomic Database as well as in previously reported studies. All of the expressed sequence tags (ESTs) of gerbil were submitted to GenBank and their IDs and names are presented in S1 Table. Based on similarities to sequences found in the National Center for Biotechnology Information (NCBI) databases, 84 genes including ESTs were divided into 12 functional categories (Fig 2). Metabolism-related genes formed the largest category, representing 33% of the total identified genes. Proliferation or differentiation-related genes formed the second largest category (19% of the total identified genes) and genes related to the extracellular matrix, transmembrane proteins, or cell junctions formed the third largest

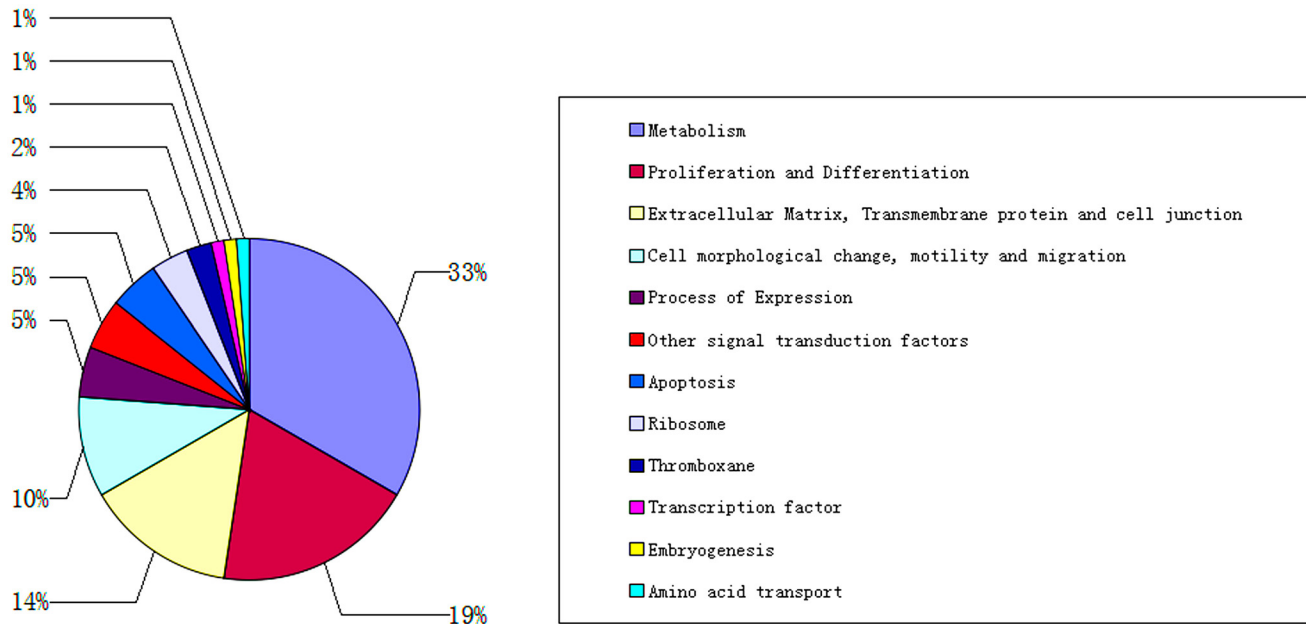

**Fig 2. Classification of genes from the suppression subtractive hybridization (SSH) libraries.** We identified 304 sequences from 12 SSH libraries. After performing Basic Local Alignment Search Tool (BLAST) analysis, we obtained 84 genes with available information on their function in previous studies or the Mouse Genome Informatics database. These 84 genes were divided into 12 groups according to their functions.

doi:10.1371/journal.pone.0127355.g002

category (14% of the total identified genes). Ten percent of total identified genes were related to cell morphology changes, motility, or migration and 5% of total identified genes were related to expression, apoptosis, and other signal transduction factors. Four percent of total identified genes were related to ribosome function and 2% of total identified genes were related to thromboxane. Finally, 1% of total identified genes were related to transcription factors, embryogenesis, and amino acid transport. We found that 16 genes were related to vasculogenesis or angiogenesis by reviewing related literature and the Mouse Genome Informatics database.

### Verification of 16 genes most likely related to vasculogenesis or angiogenesis with qPCR

We further characterized the 16 genes most likely related to vascular development or angiogenesis with qPCR. Based on Table 1, the 16 genes were derived from 7 SSH subgroups and we used the samples from the corresponding CoW types to identify these genes. The results showed that 4 out of 16 genes (25.0%) had significantly different expression level from the corresponding types of the CoW within same SSH group, and CoW patterns of the higher expression sample were in accordance with those of the tester in the corresponding SSH subgroup (Fig 3). These 4 genes were cysteine proteinase inhibitor *cystatin C* (*CST3*), *guanine nucleotide binding protein alpha stimulating* (*GNAS*), *glutathione peroxidase 4* (*GPx4*), and *profilin 2* (*PFN2*). *CST3* was identified from subgroup 2.1 and its relative expression level in the Type B-I was significantly higher than that in the Type B-III ( $p = 0.042, \leq 0.05$ ). *GNAS* was identified from subgroup 2.2 and its relative expression level in the Type B-I was significantly higher than that in the Type B-III ( $p = 0.032, \leq 0.05$ ). *GPx4* and *PFN2* were both identified from subgroup 4.1. The relative expression level of *GPx4* in the Type A-I was significantly higher than that in the Type A-IV ( $p = 0.003, \leq 0.01$ ) and of *PFN2* in the Type B-I was significant higher

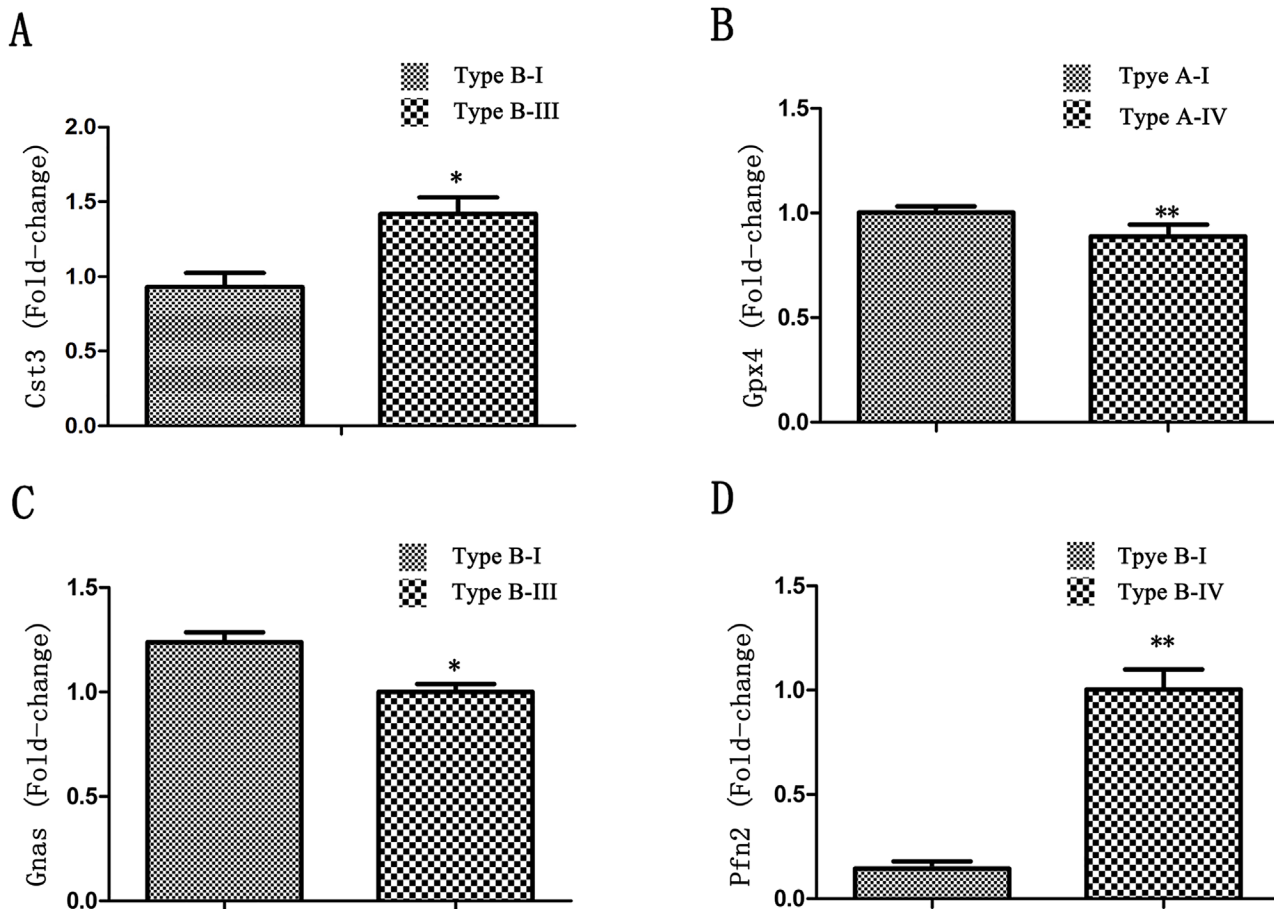

**Fig 3. Relative expression of 4 genes (*CST3*, *GNAS*, *GPx4*, and *PFN2*) with significantly different expression levels between different types of the Circle of Willis.** (A) The relative expression levels of *CST3* between the Type B-I and Type B-III. (B) The relative expression levels of *GNAS* between the Type B-I and Type B-III. (C) The relative expression of levels *GPx4* between the Type A-IV and Type A-I. (D) The relative expression levels of *PFN2* between the Type B-I and Type B-IV. \*  $p < 0.05$ , \*\*  $p < 0.01$ .

doi:10.1371/journal.pone.0127355.g003

than that in the Type B-IV ( $p = 0.001, \leq 0.01$ ). These results indicated that these 4 genes might be related to the CoW patterns in gerbils.

### Molecular cloning of the coding sequence (CDS) of *PFN2*, *GPx4*, *GNAS*, and *CST3* and homology analysis with other species by DNA Star

We obtained the CDS of the 4 genes *PFN2*, *GPx4*, *GNAS*, and *CST3* with primers that we designed and presented in Table 2. The sequences of these 4 genes were submitted to GenBank along with their accession numbers (Table 2). We analyzed the CDSs and compared them against 3 common experimental animals [*Gallus gallus* (chicken), *Mus musculus* (mouse), and *Rattus norvegicus* (rat)] and *Homo sapiens* (human). We performed sequence distance analysis and drew the phylogenetic tree to analyze their homology. We found that the sequences of the CDSs of the 4 genes in gerbils were similar to the sequences of other species. *PFN2* of gerbils showed greater similarity with that of other species (91.7%, 97.6%, 95.8%, and 96.7% with that of chicken, mouse, rat, and human, respectively) than the other 3 genes, while *CST3* of gerbils had the lowest similarity with that of other species (54.8%, 80.4%, 79.2% and 72.6% with that of chicken, mouse, rat, and human, respectively) (Fig 4). The protein products of the 4 genes in

**Table 2. Accession number, primer sequences, annealing temperatures, and length of PCR products used for PCR cloning of *CST3*, *GNAS*, *GPx4* and *PFN2*.**

| Genes       | Accession number | Primer         | Sequence               | Annealing temperature (°C) | Product length (bp) |
|-------------|------------------|----------------|------------------------|----------------------------|---------------------|
| <i>CST3</i> | KM517575         | Forward Primer | AAAAGTCGCACGGAGTAGCA   | 58                         | 630                 |
|             |                  | Reverse Primer | CCTGCAGCAGCTCCTTTACT   |                            |                     |
| <i>GNAS</i> | KM517576         | Forward Primer | GCTGCCTCGGCAACAGTAA    | 58                         | 1389                |
|             |                  | Reverse Primer | CTTTTTCGTCTGTAGGCCGC   |                            |                     |
| <i>GPx4</i> | KM517578         | Forward Primer | ACCAATAAGAGACGTCAGTGGG | 58                         | 802                 |
|             |                  | Reverse Primer | TGGTTTTCAGGCAGACCTTCA  |                            |                     |
| <i>PFN2</i> | KM517577         | Forward Primer | TAACTGATGTGGATGGCT     | 58                         | 816                 |
|             |                  | Reverse Primer | CACCGGCACCTTGCTTACTA   |                            |                     |

doi:10.1371/journal.pone.0127355.t002

gerbils also shared common amino-acid sequences with the other 3 species and human (the highest was for PFN2 and lowest for CST3). Based on the results, we performed Western blotting using mouse antibodies to analyze the proteins encoded by these 4 genes in the gerbil brain.

### Verification of qPCR-positive genes with Western blotting

We further verified the 4 genes related to vasculogenesis or angiogenesis by Western blotting using glyceraldehyde 3-phosphate dehydrogenase (GAPDH) as an internal control. The results (Fig 5) demonstrated that the expression level of *CST3* in the Type B-I was significantly higher than that in the Type B-III ( $p = 0.048, \leq 0.05$ ). The expression level of *GNAS* in the Type B-I was significantly higher than that in the Type B-III ( $p = 0.039, \leq 0.05$ ). The expression level of *GPx4* was significantly higher in the Type A-I than that in the Type A-III ( $p = 0.037, \leq 0.05$ ). The expression level of *PFN2* in the Type B-I was significantly higher than that in the Type B-IV ( $p = 0.014, \leq 0.05$ ). These results were consistent with those obtained from qPCR and further confirmed that the 4 genes were associated with variations of the CoW in gerbils.

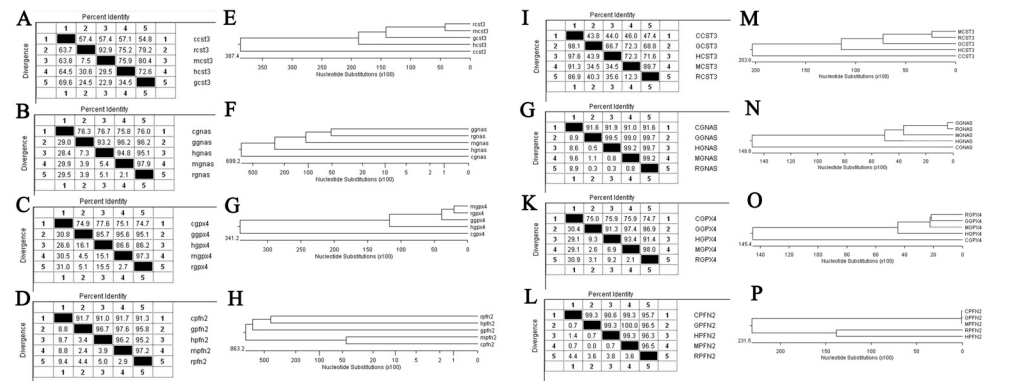

**Fig 4. Analysis of open reading frames (ORFs) of *CST3*, *GNAS*, *GPx4*, and *PFN2* with DNASTar.** We analyzed the obtained sequences with the ORFs of *Gallus gallus* (chicken), *Mus musculus* (mouse), and *Rattus norvegicus* (rat), and *Homo sapiens* (human). We aligned the sequence distances and drew the phylogenetic tree to analyze their homology. A–D show the results of the DNA sequence distances analysis and E–H show their phylogenetic tree. I–L show the results of the protein sequence distance analysis and M–P show their phylogenetic tree. c/G- *Gallus gallus*, g/G- Gerbils, h/H- *Homo sapiens*, r/R- *Rattus norvegicus*, m- *Mus musculus*.

doi:10.1371/journal.pone.0127355.g004

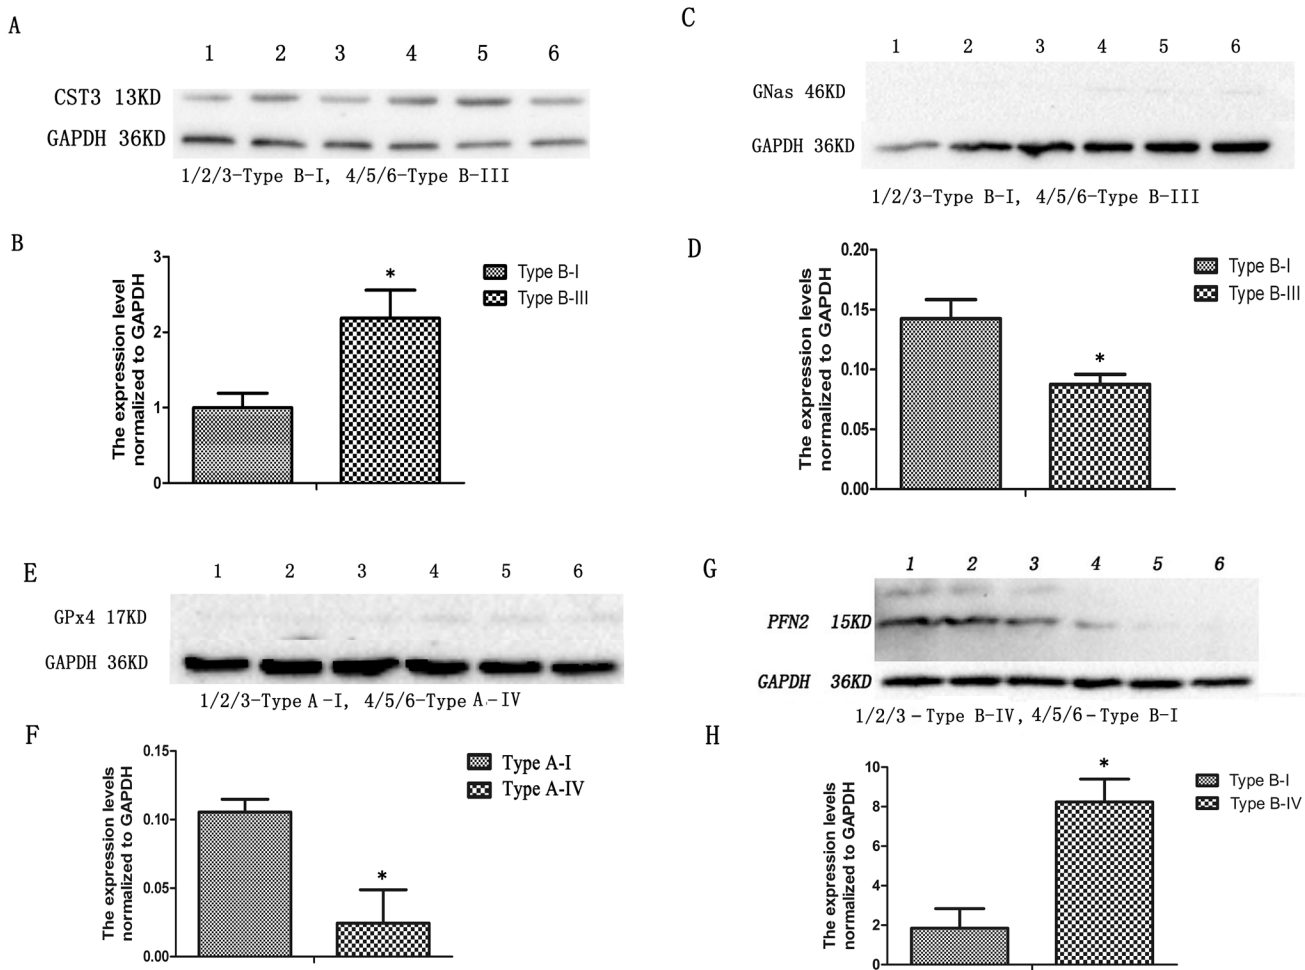

**Fig 5. Verification of genes identified from the suppression subtractive hybridization (SSH) libraries with Western blotting.** (A) The protein level of CST3 between the Type B-I and Type B-III. (B) The semi-quantitative protein level of CST3. (C) The protein level of GNAS between the Type B-I and Type B-III. (D) The semi-quantitative protein level of GNAS. (E) The protein level of GPx4 between the Type A-I and Type A-IV. (F) The semi-quantitative protein level of GPx4. (G) The protein level of PFN2 between Type B-I and Type B-IV. (H) The semi-quantitative protein level of PFN2. \*  $p < 0.05$ .

doi:10.1371/journal.pone.0127355.g005

## Discussion

SSH is one of the most effective methods to identify differentially expressed genes from various samples [17], and it has been widely used in multiple species and tissues [18–20]. We used samples obtained from inbred gerbils to perform SSH and identify genes related to different types of the CoW. Every pair of tester and driver cDNA originated from the same litter to reduce genetic diversity as much as possible. All the animals that we used were from F<sub>10</sub> and inbred by sister and brother mating, which minimized genetic diversity while maintaining differences in the phenotypes of different patterns of the CoW.

We applied SSH to determine the genes that were related to variations in the CoW. From 12 SSH libraries, we identified 304 gene sequences in which 23% were ESTs. The percentage was less than that in previous reports [21,22], which might be attributed that in this study we used inbred gerbils with high genetic consistency. Most of the identified genes were associated with proliferation, differentiation, migration, and apoptosis, all of which may influence vascular development. Using the ESTs, we identified 4 genes (*PFN2*, *GPx4*, *GNAS*, and *CST3*) associated with variations in the CoW in gerbils.



We cloned the 4 genes and identified their CDSs. After the analysis of CDSs and amino-acid sequences of the 4 genes, we found that the sequences from gerbils had a high level of homology with sequences of other species. Hence, the Western blotting results using mouse antibodies were reliable. PFN2 showed the greatest homology between gerbils and the other study species, while CST3 had the least amount of homology. Furthermore, the percent identity of PFN2 between humans and gerbils was 96.7%, which was higher than that between humans and rats (95.2%) and between humans and mice (96.2%), suggesting that the gerbil is a better animal model for studying the function of PFN2 in humans. It was shown that the 4 genes shared a good homology among the 5 species, while the best was between gerbils, mice, and rats. Our previous research showed a higher percentage of cross-amplification between the gerbil and mouse primers than that between the gerbil and rat primers, suggesting that the gerbil may be more genetically similar to the mouse than to the rat [23], which was also verified in the present study.

CST3 is the most crucial extracellular inhibitor of many cysteine proteinases, and an imbalance between cysteine proteinases and cystatins can lead to connective tissue remodeling [24]. It has been shown that the expression of vascular endothelial growth factor (VEGF) is correlated with CST3 in patients with esophageal carcinoma [25]. The authors suggested that this correlation might be due to the diminishment of renal clearance of the low-weight VEGF and CST3 or the alteration of the glomerular filtration ratio caused by the increased endothelial cell proliferation in the glomeruli induced by increased amounts of VEGF, rather than the direct or indirect interaction between the two proteins. CST3 is an inhibitor of cathepsins, which inhibit the tubule formation of endothelial cells [26] and show antiangiogenic characteristics in vitro [27]. It has been confirmed that CST3 is degraded by matrix metalloproteinase-2 (MMP-2), which is a potent pluripotential angiogenic stimulator. MMP-2 degrades and inactivates VEGF-binding inhibitory proteins without degrading or inactivating VEGF [28]. Hence, CST3 and VEGF should have reverse functions. Alternatively, CST3 inhibits vascular development, which is consistent with our findings that the expression level of CST3 is higher in brains with a complete ACoA than in those where the ACoA is small on the left side. The complex locus, *GNAS*, gives rise to multiple gene products [29], mediating the actions of endogenous molecules through the generation of intracellular cyclic AMP (cAMP) [30]. It has been reported that cAMP analogs (8-Bromo-cAMP) and forskolin (an adenylate cyclase activator) decrease transforming growth factor beta 1 (TGF $\beta$ 1)-induced angiogenesis in vitro in mouse endothelial cell lines and in primary cultures of human umbilical vein endothelial cells [31]. Alternatively, Thaker et al. identified the  $\beta$ -adrenergic activation of the cAMP—PKA signaling pathway as one of the mechanisms that enhances tumor angiogenesis in vivo [32]. The mechanism of *GNAS* affects the cerebral vascular development probably through this pathway. GPx4 is an important intracellular antioxidant enzyme that reduces the level of phospholipid hydroperoxides [33]. Schneider et al. showed that GPx4 plays an important role in angiogenesis and vessel maturation by regulating the activity of 12/15-lipoxygenase [34] and is also associated with VEGF [34]. The expression of GPx4 in the right side of the incomplete ACoA and the complete ACoA was significantly different. Previous studies have shown that the migration of endothelial progenitor or endothelial cells occurs in both vasculogenesis and angiogenesis, requiring multiple cellular processes including polymerization and depolymerization of the actin cytoskeleton regulated by actin-binding proteins [35]. Among the actin-binding proteins, PFNs are the pivotal actin polymerization regulators. PFNs have 4 isoforms [36] of which PFN1 and PFN2 play non-redundant roles in the non-canonical Wnt signaling pathway as effectors for disheveled-associated activation of morphogenesis 1 (DAAM1) in vertebrate gastrulation of *Xenopus* [37]. We hypothesize that PFN2 may affect vasculogenesis or angiogenesis during

vertebrate gastrulation in gerbils. This was supported by our results that the expression level of PFN2 was higher in the right side of the incomplete ACoA than that in the complete ACoA.

The 4 genes identified from the SSH libraries and validated by qPCR might affect vascular development independently, congruently, or by interacting with other genes related to vascular development. Many genes identified in this study are poorly understood and may also influence the variations in the CoW. In conclusion, we performed SSH using inbred gerbils and identified 4 genes (*CST3*, *GNAS*, *GPx4* and *PFN2*) associated with variations in the CoW.

## Materials and Methods

### Ethics statement

All the experiments and animal procedures were conducted in accordance with the Guideline of the Capital Medical University Animal Experiments and the Experimental Animals Management Committee. The protocol was approved by the Animal Experiments and Experimental Animal Welfare Committee of Capital Medical University (Permit Number: 2011-X-009).

### Animal material

In this study, the brains of 24 adult animals (age 6–10 months) were screened; 9 animals were used to build SSH libraries, and the other 15 were used to verify the selected genes. First, the animals were given an overdose of pentobarbital and euthanized. The brains were removed, the PCoA and ACoA were evaluated using a Leica EZ4 dissecting microscope (Leica, USA), and photos were taken. We retrieved 24 brain samples, which were grouped according to the type of the CoW and stored in liquid nitrogen until use ([Table 1](#)).

### Construction of SSH libraries

We used each pair of samples as indicated in [Table 1](#) to establish 2 or 6 SSH libraries for each group ([Table 1](#)). Total RNA was extracted from frozen tissues using TRIzol reagent (Tiangen, China). Purification of mRNA from identical amounts of total RNA (200  $\mu$ g) was performed using Purification of poly(A) RNA kit (Macherey-Nagel, Germany) following manufacturer's instructions. We synthesized cDNA using Universal RiboClone cDNA Synthesis System (Promega, USA) following manufacturer's instructions. SSH was employed to identify distinct genes between various types of the CoW using PCR-Select cDNA Subtraction Kit (Clontech, USA) following the manufacturer's instructions. Subtractions were performed using a 5-fold excess amount of driver cDNA against tester cDNA. Finally, the subtraction efficiency was evaluated by qPCR with  *$\beta$ -actin* primers on subtracted or unsubtracted cDNA and Southern blotting with dig-labeled SSH PCR product on itself and the SSH PCR product of another animal in the same SSH group. An iQ5 thermal cycler (Bio-Rad, USA) was used to perform qPCR as follows: pre-denaturation at 95°C for 15 min, 40 cycles of denaturation at 95°C for 10 s, annealing and extension at 60°C for 35 s, and 71 cycles of melt-curve analysis at 60°C for 10 s. The processes of Southern blotting were performed using DIG High Prime DNA Labeling and Detection Starter Kit II (Roche, USA). Grey scanning value was obtained using Band Leader 3.0 (copyright of M. Aharoni). The confirmed cDNA with high subtraction efficiency was purified using a Gel purification kit (Axygen, USA), ligated into the pMD19-T Vector (TaKaRa, Japan), transformed into DH5a competent cells (ExCell, China), and maintained at 37°C with shaking (200 rotations  $\text{min}^{-1}$ ) overnight followed by plating onto agar plates containing ampicillin, X-gal, and isopropyl- $\beta$ -D-thiogalactoside (IPTG). Then, we performed DNA sequencing (Ruiboxingke, China) of SSH libraries and BLAST analysis.

### Analysis of expressed genes in different types of the CoW with qPCR

After cDNA sequencing and BLAST analysis, we designed primers (Table 3) for 16 genes that were likely related to vascular development and angiogenesis, in order to analyze the distinct expression of these genes in different types of the CoW using qPCR. An iQ5 thermal cycler (Bio-Rad, USA) was used to perform qPCR as follows: pre-denaturation at 95°C for 15 min, 40 cycles of denaturation at 95°C for 10 s, annealing and extension at 60°C for 35 s, and 71 cycles of melt curve analysis at 60°C for 10 s. The expression levels of gene transcripts were normalized to *β-actin*. Brain tissues from 3 animals were used for the identification of gene expression level of each type of the CoW. A total of 15 adult animal brains were used and their CoW patterns are presented in Table 1. Total RNA was extracted from frozen tissues using TRIzol

**Table 3. Gene names, primer sequences, annealing temperatures, and length of PCR products used for qPCR analysis of 16 genes related to vasculogenesis or angiogenesis.**

| Gene                             | Primer         | Sequence                     | Annealing temperature (°C) | Product length (bp) |
|----------------------------------|----------------|------------------------------|----------------------------|---------------------|
| <i>β-tubulin</i>                 | Forward Primer | CGAACAGATGCTTACGTCCAA        | 60                         | 100                 |
|                                  | Reverse Primer | GCCCCGAGGTGGAATGTC           |                            |                     |
| <i>WNK</i>                       | Forward Primer | TTCCCGACCGTCTCTAATTC         | 60                         | 126                 |
|                                  | Reverse Primer | AAGACATCGTAGACAAAGGACCAACT   |                            |                     |
| <i>Catenin beta 1</i>            | Forward Primer | GCAACCCTGAGGAAGAAGATGT       | 60                         | 104                 |
|                                  | Reverse Primer | CCCGTCAATATCAGCTACTTGCT      |                            |                     |
| <i>GNAS</i>                      | Forward Primer | TCAAGCAGGCCGACTACGT          | 60                         | 100                 |
|                                  | Reverse Primer | TTGACTTTGTCCACCTGGAAGCTT     |                            |                     |
| <i>Basigin</i>                   | Forward Primer | ACAGCAGTGGCGTTGACATC         | 60                         | 105                 |
|                                  | Reverse Primer | CTGCGTCCACTATGTAAGTTCGTATG   |                            |                     |
| <i>Cofilin 2</i>                 | Forward Primer | GCTCCGTGTGCGCTCTCT           | 60                         | 109                 |
|                                  | Reverse Primer | CCAGTAGAATCAAGTCCAGTTTTGC    |                            |                     |
| <i>CST3</i>                      | Forward Primer | GCGTTGGACTTCGCTGTGA          | 60                         | 101                 |
|                                  | Reverse Primer | CCAGCCACGAGCTGCTTAC          |                            |                     |
| <i>GPx4</i>                      | Forward Primer | AGGCAGGAGCCAGGAAGTAATC       | 60                         | 102                 |
|                                  | Reverse Primer | GGCATCGTCCCATTTACAC          |                            |                     |
| <i>Id1</i>                       | Forward Primer | CGACATGAACGGCTGCTACTC        | 60                         | 100                 |
|                                  | Reverse Primer | GTCGATTACATGCTGCAGGATCT      |                            |                     |
| <i>Pkp4</i>                      | Forward Primer | CGAGCTTCTAAGGATGGATAATGAC    | 60                         | 104                 |
|                                  | Reverse Primer | CGTATTTACCTATGAGCTCCTTGTGTTG |                            |                     |
| <i>PFN2</i>                      | Forward Primer | AGCAAGGTGCCGGTGTACA          | 60                         | 100                 |
|                                  | Reverse Primer | AACCATGCGCTACAAAAGGAA        |                            |                     |
| <i>Tspan7</i>                    | Forward Primer | TGCTGGCATTTCTGGATTTGT        | 60                         | 100                 |
|                                  | Reverse Primer | CCTCTCATCATTGCCATTGTAGTT     |                            |                     |
| <i>Tnfrsf1b</i>                  | Forward Primer | ACACCTACAAACGGAACTT          | 60                         | 104                 |
|                                  | Reverse Primer | ACATATTGGCCAGGAGGACACTTA     |                            |                     |
| <i>Fzd8</i>                      | Forward Primer | GCAGCGGGACTTAAATGAC          | 60                         | 106                 |
|                                  | Reverse Primer | ACCATGTCTGGGGTAAGTGC         |                            |                     |
| <i>Rtn4</i>                      | Forward Primer | CCACCCATTGAGGCATATT          | 60                         | 110                 |
|                                  | Reverse Primer | TCAATTCTTTTATTGTGCTGTTTACA   |                            |                     |
| <i>SC1</i>                       | Forward Primer | AACGCGCAAACATCACAAG          | 60                         | 100                 |
|                                  | Reverse Primer | TTTAAGTCTTGGGTTGCTTGCT       |                            |                     |
| <i>β-actin(Internal control)</i> | Forward Primer | AGAGGGAAATCGTGCCTGAC         | 60                         | 137                 |
|                                  | Reverse Primer | CAATAGTGATGACCTGGCCGT        |                            |                     |

doi:10.1371/journal.pone.0127355.t003

reagent (Tiangen, China), and the total RNA was treated with DNase I (RNase Free) (Tiangen, China). The first strand of cDNA was synthesized from total RNA using Fast Quant RT Kit (Tiangen, China). Reverse transcription (RT) reaction was performed as follows: 42°C for 15 min followed by 95°C for 3 min.

### CDS cloning of verified genes and analysis with DNA Star

Four genes (*CST3*, *GNAS*, *GPx4* and *PFN2*) were confirmed by qPCR and identified as being associated with variations in the CoW. To clone these 4 genes, PCR was performed using full-length cDNA synthesized previously with pfu high-fidelity DNA polymerase that kindly provided by Professor Li. The primers used and the annealing temperatures are presented in [Table 2](#). The experiment was performed on a MyCycler thermal cycler (Bio-Rad, USA) as follows: 95°C for 5 min for pre-denaturation, 30 cycles of 95°C for 30 s, 55°C for 30 s, 72°C for 120 s, and a final extension at 72°C for 5 min. Electrophoresis of PCR products was performed on a 2% agarose gel. DNA sequencing (Ruiboxingke, China) and sequence analysis were performed with DNA Star v 7.1 software (DNA Star, USA).

### Western blotting analysis

After qPCR analysis, the 4 possible CoW variation-related proteins were analyzed by Western blotting. Proteins were extracted from the samples using Proteins Extraction Kit (CWBIO, China) and quantified with BCA-Reagents (CWBIO, China). Protein lysates were subjected to sodium dodecyl sulfate-polyacrylamide gel electrophoresis (SDS-PAGE) at 160 V on 12% gel (CWBIO, China) for 1 h and then transferred to a 0.22 µm nitrocellulose filter membrane (NC) at 200 mA for 3 h. The primary antibodies *CST3* and *PFN2* (Santa, USA) were diluted 1:100, *GNAS* and *GPx4* (abcam, UK) were diluted 1:2500, and the secondary antibodies were diluted 1:5000. The membranes were washed completely and visualized with enhanced chemiluminescence (ECL) immunoblotting detection reagents (Thermo Fisher Scientific, USA). Semi-quantitative results were normalized to the housekeeping gene *GAPDH* after gray scanning.

### Statistical analysis

Statistical analysis was performed using SPSS 16.0 (SPSS Inc., USA). Comparisons between different groups were conducted using Student's t-test. Means were considered significant at  $p < 0.05$  and highly significant at  $p < 0.01$ .

### Supporting Information

**S1 Fig. Twelve genes with no significantly different expression levels between the different types of the Circle of Willis.**

(TIF)

**S1 Table. The User Id, dbEST Id and GenBank Accn of the EST we got from the SSH libraries.**

(PDF)

### Author Contributions

Conceived and designed the experiments: ZL XD ZC. Performed the experiments: ZL XH SZ JL CL MG RF ZH XD ZC. Analyzed the data: ZL XH XD ZC. Contributed reagents/materials/

analysis tools: ZL XH XD ZC. Wrote the paper: ZL XD ZC. Obtained permission for use of animals: XD ZC.

## References

1. The treatment of hypertensive cerebral vascular disease related issues. *Medicine papers*.
2. Li GQ, Fan J, Liu J, Wang W, Wang M, Qi Y, et al. Impact of cerebrovascular disease mortality on life expectancy in China. *Biomed Environ Sci*. 2014; 27: 169–175. doi: [10.3967/bes2014.038](https://doi.org/10.3967/bes2014.038) PMID: [24709097](https://pubmed.ncbi.nlm.nih.gov/24709097/)
3. Kris-Etherton PM, Akabas SR, Bales CW, Bistrrian B, Braun L, Edwards MS, et al. The need to advance nutrition education in the training of health care professionals and recommended research to evaluate implementation and effectiveness. *Am J Clin Nutr*. 2014; 99: 9.
4. Schomer DF, Marks MP, Steinberg GK, Johnstone IM, Boothroyd DB, Ross MR, et al. The anatomy of the posterior communicating artery as a risk factor for ischemic cerebral infarction. *N Engl J Med*. 1994; 330: 1565–1570. PMID: [8177246](https://pubmed.ncbi.nlm.nih.gov/8177246/)
5. Kapoor K, Singh B, Dewan LI. Variations in the configuration of the circle of Willis. *Anat Sci Int*. 2008; 83: 96–106. doi: [10.1111/j.1447-073X.2007.00216.x](https://doi.org/10.1111/j.1447-073X.2007.00216.x) PMID: [18507619](https://pubmed.ncbi.nlm.nih.gov/18507619/)
6. Gasparotti R, Liserre R Intracranial aneurysms. *Eur Radiol*. 2005; 15: 441–447. PMID: [15678323](https://pubmed.ncbi.nlm.nih.gov/15678323/)
7. Stojanovic N, Stefanovic I, Randjelovic S, Mitic R, Bosnjakovic P, Stojanov D. Presence of anatomical variations of the circle of Willis in patients undergoing surgical treatment for ruptured intracranial aneurysms. *Vojnosanit Pregl*. 2009; 66: 711–717. PMID: [19877549](https://pubmed.ncbi.nlm.nih.gov/19877549/)
8. Yang K, Banerjee S, Proweller A. Regulation of pre-natal circle of Willis assembly by vascular smooth muscle Notch signaling. *Dev Biol*. 2013; 381: 107–120. doi: [10.1016/j.ydbio.2013.06.007](https://doi.org/10.1016/j.ydbio.2013.06.007) PMID: [23769842](https://pubmed.ncbi.nlm.nih.gov/23769842/)
9. Chuang YM, Chan L, Lai YJ, Kuo KH, Chiou YH, Huang LW, et al. Configuration of the circle of Willis is associated with less symptomatic intracerebral hemorrhage in ischemic stroke patients treated with intravenous thrombolysis. *J Crit Care*. 2013; 28: 166–172. doi: [10.1016/j.jcrc.2012.08.018](https://doi.org/10.1016/j.jcrc.2012.08.018) PMID: [23102529](https://pubmed.ncbi.nlm.nih.gov/23102529/)
10. Hendrikse J, Hartkamp MJ, Hillen B, Mali WP, van der Grond J. Collateral ability of the circle of Willis in patients with unilateral internal carotid artery occlusion: border zone infarcts and clinical symptoms. *Stroke*. 2001; 32: 2768–2773. PMID: [11739971](https://pubmed.ncbi.nlm.nih.gov/11739971/)
11. Levine S, Payan H. Effects of ischemia and other procedures on the brain and retina of the gerbil (*Meriones unguiculatus*). *Exp Neurol*. 1966; 16: 255–262. PMID: [5928981](https://pubmed.ncbi.nlm.nih.gov/5928981/)
12. Du XY, Zhu XD, Dong G, Lu J, Wang Y, Zeng L, et al. Characteristics of circle of Willis variations in the mongolian gerbil and a newly established ischemia-prone gerbil group. *IJAR J*. 2011; 52: E1–7. PMID: [21454921](https://pubmed.ncbi.nlm.nih.gov/21454921/)
13. Li Q, Li J, Lv F, Li K, Luo T, Xie P. A multidetector CT angiography study of variations in the circle of Willis in a Chinese population. *J Clin Neurosci*. 2011; 18: 379–383. doi: [10.1016/j.jocn.2010.07.137](https://doi.org/10.1016/j.jocn.2010.07.137) PMID: [21251838](https://pubmed.ncbi.nlm.nih.gov/21251838/)
14. Balseiro P, Falco A, Romero A, Dios S, Martinez-Lopez A, Figueras A, et al. Mytilus galloprovincialis mytacin C: a chemotactic molecule with antiviral activity and immunoregulatory properties. *PLoS ONE*. 2011; 6: 8.
15. Hayward DC, Hetherington S, Behm CA, Grasso LC, Foret S, Miller DJ, et al. Differential gene expression at coral settlement and metamorphosis—a subtractive hybridization study. *PLoS ONE*. 2011; 6: 31.
16. Gardmo C, Swerdlow H. Mode A Growth hormone regulation of rat liver gene expression assessed by SSH and microarray. *Mol Cell Endocrinol*. 2002; 190: 125–133. PMID: [11997186](https://pubmed.ncbi.nlm.nih.gov/11997186/)
17. Portal O, Izquierdo Y, De Vleeschauwer D, Sanchez-Rodriguez A, Mendoza-Rodriguez M, Acosta-Suarez M, et al. Analysis of expressed sequence tags derived from a compatible *Mycosphaerella fijiensis-banana* interaction. *Plant Cell Rep*. 2011; 30: 913–928. doi: [10.1007/s00299-011-1008-z](https://doi.org/10.1007/s00299-011-1008-z) PMID: [21279642](https://pubmed.ncbi.nlm.nih.gov/21279642/)
18. Sahebi M, Hanafi MM, Abdullah SN, Rafii MY, Azizi P, Nejat N, et al. Isolation and expression analysis of novel silicon absorption gene from roots of mangrove (*Rhizophora apiculata*) via suppression subtractive hybridization. *Biomed Res Int*. 2014; 971985: 1. doi: [10.1155/2014/971985](https://doi.org/10.1155/2014/971985) PMID: [24516858](https://pubmed.ncbi.nlm.nih.gov/24516858/)
19. Xu JW, Zhao W, Xu YN, Zhong JJ. Isolation and analysis of differentially expressed genes during asexual sporulation in liquid static culture of *Ganoderma lucidum* by suppression subtractive hybridization. *Mol Biol Rep*. 2012; 39: 3603–3610. doi: [10.1007/s11033-011-1134-2](https://doi.org/10.1007/s11033-011-1134-2) PMID: [21725848](https://pubmed.ncbi.nlm.nih.gov/21725848/)
20. Ghosh S, Singh UK, Meli VS, Kumar V, Kumar A, Irfan M, et al. Induction of senescence and identification of differentially expressed genes in tomato in response to monoterpene. *PLoS ONE*. 2013; 8.

21. He N, Liu H, Xu X. Identification of genes involved in the response of haemocytes of *Penaeus japonicus* by suppression subtractive hybridization (SSH) following microbial challenge. *Fish Shellfish Immunol.* 2004; 17: 121–128. PMID: [15212732](#)
22. Alam MA, Hongpo W, Hong Z, Ji WQ. Differential expression of resistance to powdery mildew at the early stage of development in wheat line N0308. *Genet Mol Res.* 2014; 13: 4289–4301. doi: [10.4238/2014.June.9.15](#) PMID: [25036173](#)
23. Du X, Chen Z, Li W, Tan Y, Lu J, Zhu X, et al. Development of novel microsatellite DNA markers by cross-amplification and analysis of genetic variation in gerbils. *J Hered.* 2010; 101: 710–716. doi: [10.1093/jhered/esq066](#) PMID: [20525768](#)
24. Cimerman N, Brguljan PM, Krasovec M, Suskovic S, Kos J. Serum cystatin C, a potent inhibitor of cysteine proteinases, is elevated in asthmatic patients. *Clin Chim Acta.* 2000; 300: 83–95. PMID: [10958865](#)
25. Drelich M, Wagenius G, Bergstrom S, Brattstrom D, Larsson A, Hesselius P, et al. The role of cystatin C and the angiogenic cytokines VEGF and bFGF in patients with esophageal carcinoma. *Med Oncol.* 2005; 22: 29–38. PMID: [15750194](#)
26. Shi GP, Sukhova GK, Kuzuya M, Ye Q, Du J, Zhang Y, et al. Deficiency of the cysteine protease cathepsin S impairs microvessel growth. *Circ Res.* 2003; 92: 493–500. PMID: [12600886](#)
27. Zhang J, Wang P, Huang YB, Li J, Zhu J, Luo X, et al. Plasma cathepsin L and its related pro/antiangiogenic factors play useful roles in predicting rich coronary collaterals in patients with coronary heart disease. *J Int Med Res.* 2010; 38: 1389–1403. PMID: [20926012](#)
28. Dean RA, Butler GS, Hamma-Kourbali Y, Delbe J, Brigstock DR, Courty J, et al. Identification of candidate angiogenic inhibitors processed by matrix metalloproteinase 2 (MMP-2) in cell-based proteomic screens: disruption of vascular endothelial growth factor (VEGF)/heparin affinity regulatory peptide (pleiotrophin) and VEGF/Connective tissue growth factor angiogenic inhibitory complexes by MMP-2 proteolysis. *Mol Cell Biol.* 2007; 27: 8454–8465. PMID: [17908800](#)
29. Turan S, Bastepe M. The GNAS complex locus and human diseases associated with loss-of-function mutations or epimutations within this imprinted gene. *Horm Res Paediatr.* 2013; 80: 229–241. doi: [10.1159/000355384](#) PMID: [24107509](#)
30. Weinstein LS, Yu S, Warner DR, Liu J. Endocrine manifestations of stimulatory G protein alpha-subunit mutations and the role of genomic imprinting. *Endocr Rev.* 2001; 22: 675–705. PMID: [11588148](#)
31. del Valle-Perez B, Martinez-Estrada OM, Vilaro S, Ventura F, Vinals F. cAMP inhibits TGFbeta1-induced in vitro angiogenesis. *FEBS Lett.* 2004; 569: 105–111. PMID: [15225617](#)
32. Thaker PH, Han LY, Kamat AA, Arevalo JM, Takahashi R, Lu C, et al. Chronic stress promotes tumor growth and angiogenesis in a mouse model of ovarian carcinoma. *Nat Med.* 2006; 12: 939–944. PMID: [16862152](#)
33. Ursini F, Maiorino M, Valente M, Ferri L, Gregolin C. Purification from pig liver of a protein which protects liposomes and biomembranes from peroxidative degradation and exhibits glutathione peroxidase activity on phosphatidylcholine hydroperoxides. *Biochim Biophys Acta.* 1982; 710: 197–211. PMID: [7066358](#)
34. Schneider M, Wortmann M, Mandal PK, Arpornchayanon W, Jannasch K, Alves F, et al. Absence of glutathione peroxidase 4 affects tumor angiogenesis through increased 12/15-lipoxygenase activity. *Neoplasia.* 2010; 12: 254–263. PMID: [20234819](#)
35. DesMarais V, Ghosh M, Eddy R, Condeelis J. Cofilin takes the lead. *J Cell Sci.* 2005; 118: 19–26. PMID: [15615780](#)
36. Mouneimne G, Hansen SD, Selfors LM, Petrak L, Hickey MM, Gallegos LL, et al. Differential remodeling of actin cytoskeleton architecture by profilin isoforms leads to distinct effects on cell migration and invasion. *Cancer Cell.* 2012; 22: 615–630. doi: [10.1016/j.ccr.2012.09.027](#) PMID: [23153535](#)
37. Khadka DK, Liu W, Habas R. Non-redundant roles for Profilin2 and Profilin1 during vertebrate gastrulation. *Dev Biol.* 2009; 332: 396–406. doi: [10.1016/j.ydbio.2009.06.008](#) PMID: [19523939](#)
